# Supplementary material for: Six-month follow-up of minimally invasive nerve-sparing complete excision of endometriosis: What about dyspareunia?
Source: PLoS One. 2021 Apr 23;16(4):e0250046. doi: 10.1371/journal.pone.0250046 (PMC8064592; doi:10.1371/journal.pone.0250046)
Supplement: S1 Table — (XLSX) [file pone.0250046.s001.xlsx]

## Sheet: Preoperative personal data
Birth	AGE	Ethnicity	Partner	Schooling	REGULAR JOB	Family income	Smoking	TOTAL SMOKING TIME IN YEARS	CURRENT NUMBER OF CIGARETTES PER DAY	packs x year	Alcohol	HOW MANY TIMES A WEEK DRINK ALCOHOL	PHYSICAL ACTIVITY PER WEEK
confidential individual information	confidential individual information	caucasian	Yes	HighScool complete	confidential individual information	4 to 10 MINIMUM WAGES	Uninformed	Not applied	Not applied	Not applied	Eventually	once a week	0
confidential individual information	confidential individual information	caucasian	No	PostGrad complete	confidential individual information	4 to 10 MINIMUM WAGES	Never	Not applied	Not applied	Not applied	Eventually	once a week	2
confidential individual information	confidential individual information	caucasian	Yes	HighScool complete	confidential individual information	2 TO 4 MINIMUM WAGES	Never	Not applied	Not applied	Not applied	Eventually	less than once a week	0
confidential individual information	confidential individual information	African	Yes	HighScool complete	confidential individual information	10 to 20 MINIMUM WAGES	Never	Not applied	Not applied	Not applied	Never		0
confidential individual information	confidential individual information	Mixed	No	College not finished	confidential individual information	2 TO 4 MINIMUM WAGES	Never	Not applied	Not applied	Not applied	Eventually	less than once a week	0
confidential individual information	confidential individual information	Mixed	Yes	College complete	confidential individual information	4 to 10 MINIMUM WAGES	Never	Not applied	Not applied	Not applied	Eventually	once a week	2
confidential individual information	confidential individual information	caucasian	Yes	PostGrad complete	confidential individual information	4 to 10 MINIMUM WAGES	Stop	12	5	3	Eventually	3x a week	5
confidential individual information	confidential individual information	caucasian	Yes	PostGrad not finished	confidential individual information	MORE THAN 20 MINIMUM WAGES	Never	Not applied	Not applied	Not applied	Eventually	once a week	0
confidential individual information	confidential individual information	caucasian	Yes	College complete	confidential individual information	4 to 10 MINIMUM WAGES	Never	Not applied	Not applied	Not applied	Never		0
confidential individual information	confidential individual information	Mixed	Yes	HighScool complete	confidential individual information	LESS THAN 2 MINIMUM WAGES	Never	Not applied	Not applied	Not applied	Never		0
confidential individual information	confidential individual information	caucasian	Never	College complete	confidential individual information	4 to 10 MINIMUM WAGES	Never	Not applied	Not applied	Not applied	Eventually	4x a week	4
confidential individual information	confidential individual information	caucasian	Yes	PostGrad complete	confidential individual information	4 to 10 MINIMUM WAGES	Never	Not applied	Not applied	Not applied	stop for 1 year or more		2
confidential individual information	confidential individual information	Mixed	Yes	College complete	confidential individual information	4 to 10 MINIMUM WAGES	Never	Not applied	Not applied	Not applied	Eventually	once a week	3
confidential individual information	confidential individual information	caucasian	Yes	PostGrad complete	confidential individual information	4 to 10 MINIMUM WAGES	Never	Not applied	Not applied	Not applied	Eventually	less than once a week	0
confidential individual information	confidential individual information	Mixed	Yes	College complete	confidential individual information	MORE THAN 20 MINIMUM WAGES	Never	Not applied	Not applied	Not applied	Never		3
confidential individual information	confidential individual information	caucasian	Yes	College complete	confidential individual information	4 to 10 MINIMUM WAGES	Never	Not applied	Not applied	Not applied	Never		3
confidential individual information	confidential individual information	African	Yes	College complete	confidential individual information	MORE THAN 20 MINIMUM WAGES	Never	Not applied	Not applied	Not applied	Eventually	less than once a week	0
confidential individual information	confidential individual information	caucasian	Yes	PostGrad complete	confidential individual information	4 to 10 MINIMUM WAGES	Never	Not applied	Not applied	Not applied	Never		0
confidential individual information	confidential individual information	African	Yes	PostGrad complete	confidential individual information	4 to 10 MINIMUM WAGES	Never	Not applied	Not applied	Not applied	Never		0
confidential individual information	confidential individual information	caucasian	No	PostGrad complete	confidential individual information	10 to 20 MINIMUM WAGES	Never	Not applied	Not applied	Not applied	Eventually	twice a week	5
confidential individual information	confidential individual information	Mixed	Never	PostGrad complete	confidential individual information	4 to 10 MINIMUM WAGES	Never	Not applied	Not applied	Not applied	Eventually	once a week	2
confidential individual information	confidential individual information	African	Never	College complete	confidential individual information	4 to 10 MINIMUM WAGES	Never	Not applied	Not applied	Not applied	Eventually	less than once a week	3
confidential individual information	confidential individual information	caucasian	Yes	HighScool complete	confidential individual information	10 to 20 MINIMUM WAGES	Stop	10	3	1.5	Eventually	once a week	2
confidential individual information	confidential individual information	caucasian	Yes	College not finished	confidential individual information	10 to 20 MINIMUM WAGES	Never	Not applied	Not applied	Not applied	stop for 1 year or more		5
confidential individual information	confidential individual information	African	Yes	HighScool complete	confidential individual information	LESS THAN 2 MINIMUM WAGES	Never	Not applied	Not applied	Not applied	Never		0
confidential individual information	confidential individual information	Mixed	Yes	College complete	confidential individual information	2 TO 4 MINIMUM WAGES	Never	Not applied	Not applied	Not applied	Never		2
confidential individual information	confidential individual information	caucasian	Yes	PostGrad complete	confidential individual information	10 to 20 MINIMUM WAGES	Never	Not applied	Not applied	Not applied	Never	Uninformed	0
confidential individual information	confidential individual information	caucasian	Yes	PostGrad complete	confidential individual information	MORE THAN 20 MINIMUM WAGES	Never	Not applied	Not applied	Not applied	Eventually	once a week	3
confidential individual information	confidential individual information	African	Yes	College complete	confidential individual information	2 TO 4 MINIMUM WAGES	Never	Not applied	Not applied	Not applied	Never		0
confidential individual information	confidential individual information	Mixed	Yes	College not finished	confidential individual information	4 to 10 MINIMUM WAGES	Never	Not applied	Not applied	Not applied	Eventually	less than once a week	4
confidential individual information	confidential individual information	caucasian	Yes	College not finished	confidential individual information	2 TO 4 MINIMUM WAGES	Never	Not applied	Not applied	Not applied	Never		0
confidential individual information	confidential individual information	African	Yes	PostGrad complete	confidential individual information	10 to 20 MINIMUM WAGES	Never	Not applied	Not applied	Not applied	Never		2
confidential individual information	confidential individual information	caucasian	Yes	PostGrad complete	confidential individual information	MORE THAN 20 MINIMUM WAGES	Never	Not applied	Not applied	Not applied	Never		0
confidential individual information	confidential individual information	Mixed	Yes	College complete	confidential individual information	4 to 10 MINIMUM WAGES	Currently	12	4	2.4	Eventually	twice a week	0
confidential individual information	confidential individual information	caucasian	Yes	College complete	confidential individual information	4 to 10 MINIMUM WAGES	Never	Not applied	Not applied	Not applied	Eventually	twice a week	0
confidential individual information	confidential individual information	caucasian	Yes	College complete	confidential individual information	4 to 10 MINIMUM WAGES	Never	Not applied	Not applied	Not applied	Eventually	less than once a week	0
confidential individual information	confidential individual information	caucasian	Yes	PostGrad complete	confidential individual information	10 to 20 MINIMUM WAGES	Never	Not applied	Not applied	Not applied	Eventually	once a week	6
confidential individual information	confidential individual information	African	No	PostGrad complete	confidential individual information	4 to 10 MINIMUM WAGES	Currently		1		Eventually	5x a week	3
confidential individual information	confidential individual information	caucasian	No	PostGrad complete	confidential individual information	10 to 20 MINIMUM WAGES	Never	Not applied	Not applied	Not applied	stop for 1 year or more		4
confidential individual information	confidential individual information	Mixed	Yes	PostGrad complete	confidential individual information	10 to 20 MINIMUM WAGES	Never	Not applied	Not applied	Not applied	Never		0
confidential individual information	confidential individual information	caucasian	Yes	PostGrad complete	confidential individual information	10 to 20 MINIMUM WAGES	Never	Not applied	Not applied	Not applied	Never		0
confidential individual information	confidential individual information	caucasian	Never	PostGrad complete	confidential individual information	MORE THAN 20 MINIMUM WAGES	Never	Not applied	Not applied	Not applied	Never		4
confidential individual information	confidential individual information	caucasian	Yes	College complete	confidential individual information	2 TO 4 MINIMUM WAGES	Never	Not applied	Not applied	Not applied	Eventually	less than once a week	4
confidential individual information	confidential individual information	African	Yes	College complete	confidential individual information	2 TO 4 MINIMUM WAGES	Uninformed	Not applied	Not applied	Not applied	Never		2
confidential individual information	confidential individual information	caucasian	Yes	College not finished	confidential individual information	10 to 20 MINIMUM WAGES	Never	Not applied	Not applied	Not applied	Eventually	once a week	3
confidential individual information	confidential individual information	caucasian	Yes	PostGrad complete	confidential individual information	2 TO 4 MINIMUM WAGES	Never	Not applied	Not applied	Not applied	Eventually	once a week	0
confidential individual information	confidential individual information	caucasian	Yes	HighScool complete	confidential individual information	MORE THAN 20 MINIMUM WAGES	Never	Not applied	Not applied	Not applied	Eventually	once a week	0
confidential individual information	confidential individual information	caucasian	Yes	HighScool complete	confidential individual information	4 to 10 MINIMUM WAGES	Never	Not applied	Not applied	Not applied	stop for 1 year or more		2
confidential individual information	confidential individual information	caucasian	No	PostGrad complete	confidential individual information	MORE THAN 20 MINIMUM WAGES	Never	Not applied	Not applied	Not applied	Never		2
confidential individual information	confidential individual information	caucasian	Yes	PostGrad complete	confidential individual information	MORE THAN 20 MINIMUM WAGES	Never	Not applied	Not applied	Not applied	Eventually	once a week	0
confidential individual information	confidential individual information	caucasian	Yes	PostGrad complete	confidential individual information	4 to 10 MINIMUM WAGES	Never	Not applied	Not applied	Not applied	Never		0
confidential individual information	confidential individual information	caucasian	Yes	PostGrad complete	confidential individual information	10 to 20 MINIMUM WAGES	Never	Not applied	Not applied	Not applied	Never		1
confidential individual information	confidential individual information	Mixed	Yes	PostGrad complete	confidential individual information	MORE THAN 20 MINIMUM WAGES	Never	Not applied	Not applied	Not applied	Eventually	less than once a week	3
confidential individual information	confidential individual information	caucasian	Yes	College complete	confidential individual information	4 to 10 MINIMUM WAGES	Never	Not applied	Not applied	Not applied	Eventually	once a week	1
confidential individual information	confidential individual information	caucasian	No	PostGrad not finished	confidential individual information	4 to 10 MINIMUM WAGES	Never	Not applied	Not applied	Not applied	Never		5
confidential individual information	confidential individual information	caucasian	Yes	PostGrad complete	confidential individual information	10 to 20 MINIMUM WAGES	Never	Not applied	Not applied	Not applied	Eventually	less than once a week	5
confidential individual information	confidential individual information	Mixed	Never	College not finished	confidential individual information	LESS THAN 2 MINIMUM WAGES	Never	Not applied	Not applied	Not applied	Never	Uninformed	0
confidential individual information	confidential individual information	Mixed	Yes	College complete	confidential individual information	4 to 10 MINIMUM WAGES	Never	Not applied	Not applied	Not applied	Eventually	once a week	0
confidential individual information	confidential individual information	caucasian	Yes	PostGrad complete	confidential individual information	MORE THAN 20 MINIMUM WAGES	Never	Not applied	Not applied	Not applied	Never		0
confidential individual information	confidential individual information	caucasian	Yes	PostGrad complete	confidential individual information	4 to 10 MINIMUM WAGES	Never	Not applied	Not applied	Not applied	Eventually	once a week	0
confidential individual information	confidential individual information	Mixed	Yes	College complete	confidential individual information	2 TO 4 MINIMUM WAGES	Never	Not applied	Not applied	Not applied	Eventually	less than once a week	0
confidential individual information	confidential individual information	African	No	College complete	confidential individual information	4 to 10 MINIMUM WAGES	Currently	20	20	20	Eventually	once a week	0
confidential individual information	confidential individual information	caucasian	Yes	College complete	confidential individual information	4 to 10 MINIMUM WAGES	Never	Not applied	Not applied	Not applied	Eventually	less than once a week	3
confidential individual information	confidential individual information	caucasian	Yes	College complete	confidential individual information	10 to 20 MINIMUM WAGES	Never	Not applied	Not applied	Not applied	Eventually	twice a week	0
confidential individual information	confidential individual information	caucasian	Yes	PostGrad not finished	confidential individual information	MORE THAN 20 MINIMUM WAGES	Never	Not applied	Not applied	Not applied	Eventually	once a week	0
confidential individual information	confidential individual information	caucasian	Never	PostGrad complete	confidential individual information	10 to 20 MINIMUM WAGES	Never	Not applied	Not applied	Not applied	Eventually	once a week	4
confidential individual information	confidential individual information	caucasian	Yes	HighScool complete	confidential individual information	MORE THAN 20 MINIMUM WAGES	Never	Not applied	Not applied	Not applied	Eventually	once a week	2
confidential individual information	confidential individual information	caucasian	Yes	College complete	confidential individual information	MORE THAN 20 MINIMUM WAGES	Never	Not applied	Not applied	Not applied	Eventually	once a week	0
confidential individual information	confidential individual information	caucasian	Yes	College complete	confidential individual information	10 to 20 MINIMUM WAGES	Never	Not applied	Not applied	Not applied	Never		3
confidential individual information	confidential individual information	caucasian	Never	College complete	confidential individual information	4 to 10 MINIMUM WAGES	Never	Not applied	Not applied	Not applied	Eventually	once a week	0
confidential individual information	confidential individual information	Mixed	SOLTEIRO	College complete	confidential individual information	4 to 10 MINIMUM WAGES	Never	Not applied	Not applied	Not applied	stop for 1 year or more		0
confidential individual information	confidential individual information	caucasian	Never	PostGrad complete	confidential individual information	10 to 20 MINIMUM WAGES	Never	Not applied	Not applied	Not applied	Eventually	less than once a week	2
confidential individual information	confidential individual information	caucasian	Yes	College complete	confidential individual information	10 to 20 MINIMUM WAGES	Currently	10	4	2	Eventually	less than once a week	4
confidential individual information	confidential individual information	caucasian	No	College complete	confidential individual information	4 to 10 MINIMUM WAGES	Never	Not applied	Not applied	Not applied	Eventually	once a week	7
confidential individual information	confidential individual information	caucasian	Yes	PostGrad complete	confidential individual information	10 to 20 MINIMUM WAGES	Stop	20	30	30	Eventually	once a week	2
confidential individual information	confidential individual information	African	Never	HighSchool not finished	confidential individual information	4 to 10 MINIMUM WAGES	Never	Not applied	Not applied	Not applied	Never		3
confidential individual information	confidential individual information	caucasian	Yes	PostGrad complete	confidential individual information	4 to 10 MINIMUM WAGES	Never	Not applied	Not applied	Not applied	Eventually	once a week	3
confidential individual information	confidential individual information	caucasian	Never	College complete	confidential individual information	2 TO 4 MINIMUM WAGES	Currently	2	2	0.2	Eventually	twice a week	0
confidential individual information	confidential individual information	caucasian	Yes	College complete	confidential individual information	MORE THAN 20 MINIMUM WAGES	Stop	15	20	15	Eventually	less than once a week	0
confidential individual information	confidential individual information	caucasian	Yes	PostGrad complete	confidential individual information	10 to 20 MINIMUM WAGES	Never	Not applied	Not applied	Not applied	Eventually	twice a week	0
confidential individual information	confidential individual information	Mixed	Yes	PostGrad complete	confidential individual information	10 to 20 MINIMUM WAGES	Never	Not applied	Not applied	Not applied	Eventually	twice a week	6
confidential individual information	confidential individual information	caucasian	Yes	PostGrad complete	confidential individual information	10 to 20 MINIMUM WAGES	Never	Not applied	Not applied	Not applied	Eventually	once a week	0
confidential individual information	confidential individual information	caucasian	Yes	PostGrad complete	confidential individual information	4 to 10 MINIMUM WAGES	Never	Not applied	Not applied	Not applied	Eventually	less than once a week	3
confidential individual information	confidential individual information	caucasian	Yes	PostGrad complete	confidential individual information	4 to 10 MINIMUM WAGES	Never	Not applied	Not applied	Not applied	Eventually	once a week	1
confidential individual information	confidential individual information	caucasian	Yes	PostGrad complete	confidential individual information	2 TO 4 MINIMUM WAGES	Never	Not applied	Not applied	Not applied	Eventually	less than once a week	0
confidential individual information	confidential individual information	caucasian	No	PostGrad complete	confidential individual information	10 to 20 MINIMUM WAGES	Never	Not applied	Not applied	Not applied	Eventually	less than once a week	3
confidential individual information	confidential individual information	caucasian	Yes	College not finished	confidential individual information	10 to 20 MINIMUM WAGES	Never	Not applied	Not applied	Not applied	Eventually	3x a week	0
confidential individual information	confidential individual information	African	Yes	College complete	confidential individual information	2 TO 4 MINIMUM WAGES	Never	Not applied	Not applied	Not applied	Eventually	once a week	2
confidential individual information	confidential individual information	African	Yes	College complete	confidential individual information	2 TO 4 MINIMUM WAGES	Never	Not applied	Not applied	Not applied	Never		0
confidential individual information	confidential individual information	Mixed	Yes	PostGrad complete	confidential individual information	10 to 20 MINIMUM WAGES	Never	Not applied	Not applied	Not applied	Eventually	less than once a week	3
confidential individual information	confidential individual information	caucasian	Yes	College complete	confidential individual information	4 to 10 MINIMUM WAGES	Never	Not applied	Not applied	Not applied	Never		3
confidential individual information	confidential individual information	Mixed	Yes	HighScool complete	confidential individual information	2 TO 4 MINIMUM WAGES	Never	Not applied	Not applied	Not applied	Eventually	twice a week	0
confidential individual information	confidential individual information	Mixed	Yes	College not finished	confidential individual information	4 to 10 MINIMUM WAGES	Never	Not applied	Not applied	Not applied	Never		0
confidential individual information	confidential individual information	caucasian	Yes	PostGrad complete	confidential individual information	10 to 20 MINIMUM WAGES	Never	Not applied	Not applied	Not applied	Eventually	less than once a week	2
confidential individual information	confidential individual information	Mixed	Yes	College complete	confidential individual information	10 to 20 MINIMUM WAGES	Never	Not applied	Not applied	Not applied	Eventually	less than once a week	2
confidential individual information	confidential individual information	caucasian	Never	PostGrad complete	confidential individual information	2 TO 4 MINIMUM WAGES	Never	Not applied	Not applied	Not applied	Eventually	once a week	0
confidential individual information	confidential individual information	caucasian	Yes	College complete	confidential individual information	4 to 10 MINIMUM WAGES	Never	Not applied	Not applied	Not applied	Never		0
confidential individual information	confidential individual information	African	Yes	College complete	confidential individual information	Uninformed	Never	Not applied	Not applied	Not applied	Never		0
confidential individual information	confidential individual information	African	Yes	College complete	confidential individual information	4 to 10 MINIMUM WAGES	Currently	10	1	0.5	Eventually	once a week	0
confidential individual information	confidential individual information	caucasian	Yes	PostGrad complete	confidential individual information	MORE THAN 20 MINIMUM WAGES	Never	Not applied	Not applied	Not applied	Eventually	twice a week	0
confidential individual information	confidential individual information	caucasian	Never	College not finished	confidential individual information	MORE THAN 20 MINIMUM WAGES	Never	Not applied	Not applied	Not applied	Eventually	once a week	4
confidential individual information	confidential individual information	Mixed	Yes	PostGrad complete	confidential individual information	10 to 20 MINIMUM WAGES	Never	Not applied	Not applied	Not applied	Never		4
confidential individual information	confidential individual information	caucasian	Yes	PostGrad complete	confidential individual information	4 to 10 MINIMUM WAGES	Never	Not applied	Not applied	Not applied	Eventually	less than once a week	Uninformed
confidential individual information	confidential individual information	caucasian	Yes	PostGrad complete	confidential individual information	4 to 10 MINIMUM WAGES	Currently	30	3	4.5	Eventually	once a week	0
confidential individual information	confidential individual information	caucasian	Yes	PostGrad complete	confidential individual information	10 to 20 MINIMUM WAGES	Never	Not applied	Not applied	Not applied	Eventually	once a week	0
confidential individual information	confidential individual information	caucasian	Yes	College complete	confidential individual information	10 to 20 MINIMUM WAGES	Never	Not applied	Not applied	Not applied	Eventually	less than once a week	0
confidential individual information	confidential individual information	caucasian	Yes	PostGrad complete	confidential individual information	10 to 20 MINIMUM WAGES	Never	Not applied	Not applied	Not applied	Never		0
confidential individual information	confidential individual information	caucasian	Yes	PostGrad complete	confidential individual information	4 to 10 MINIMUM WAGES	Never	Not applied	Not applied	Not applied	Eventually	less than once a week	0
confidential individual information	confidential individual information	caucasian	Yes	PostGrad complete	confidential individual information	10 to 20 MINIMUM WAGES	Never	Not applied	Not applied	Not applied	Never		0
confidential individual information	confidential individual information	caucasian	Yes	College complete	confidential individual information	MORE THAN 20 MINIMUM WAGES	Never	Not applied	Not applied	Not applied	Eventually	once a week	3
confidential individual information	confidential individual information	caucasian	Yes	PostGrad complete	confidential individual information	4 to 10 MINIMUM WAGES	Never	Not applied	Not applied	Not applied	Eventually	less than once a week	0
confidential individual information	confidential individual information	caucasian	Yes	College complete	confidential individual information	4 to 10 MINIMUM WAGES	Never	Not applied	Not applied	Not applied	Eventually	less than once a week	0
confidential individual information	confidential individual information	caucasian	Yes	College complete	confidential individual information	10 to 20 MINIMUM WAGES	Never	Not applied	Not applied	Not applied	Never		2
confidential individual information	confidential individual information	caucasian	Yes	PostGrad complete	confidential individual information	MORE THAN 20 MINIMUM WAGES	Never	Not applied	Not applied	Not applied	Never	Uninformed	0
confidential individual information	confidential individual information	Mixed	Yes	College complete	confidential individual information	4 to 10 MINIMUM WAGES	Never	Not applied	Not applied	Not applied	Never		0
confidential individual information	confidential individual information	caucasian	Never	PostGrad not finished	confidential individual information	10 to 20 MINIMUM WAGES	Never	Not applied	Not applied	Not applied	Eventually	twice a week	0
confidential individual information	confidential individual information	Índio/indígena	Yes	PostGrad complete	confidential individual information	10 to 20 MINIMUM WAGES	Never	Not applied	Not applied	Not applied	Eventually	twice a week	3
confidential individual information	confidential individual information	caucasian	Yes	College not finished	confidential individual information	MORE THAN 20 MINIMUM WAGES	Never	Not applied	Not applied	Not applied	Eventually	once a week	3
confidential individual information	confidential individual information	African	Yes	College not finished	confidential individual information	4 to 10 MINIMUM WAGES	Never	Not applied	Not applied	Not applied	Eventually	once a week	0
confidential individual information	confidential individual information	caucasian	Yes	PostGrad complete	confidential individual information	MORE THAN 20 MINIMUM WAGES	Never	Not applied	Not applied	Not applied	Eventually	less than once a week	2
confidential individual information	confidential individual information	Mixed	Yes	HighScool complete	confidential individual information	MORE THAN 20 MINIMUM WAGES	Never	Not applied	Not applied	Not applied	Eventually	once a week	3
confidential individual information	confidential individual information	caucasian	Yes	PostGrad complete	confidential individual information	MORE THAN 20 MINIMUM WAGES	Never	Not applied	Not applied	Not applied	Eventually	twice a week	0
confidential individual information	confidential individual information	caucasian	Yes	PostGrad complete	confidential individual information	MORE THAN 20 MINIMUM WAGES	Never	Not applied	Not applied	Not applied	Eventually	3x a week	3
confidential individual information	confidential individual information	caucasian	Yes	PostGrad complete	confidential individual information	MORE THAN 20 MINIMUM WAGES	Never	Not applied	Not applied	Not applied	Eventually	once a week	0
confidential individual information	confidential individual information	Mixed	No	PostGrad complete	confidential individual information	MORE THAN 20 MINIMUM WAGES	Never	Not applied	Not applied	Not applied	Eventually	less than once a week	3
confidential individual information	confidential individual information	Mixed	Yes	College not finished	confidential individual information	MORE THAN 20 MINIMUM WAGES	Never	Not applied	Not applied	Not applied	Eventually	twice a week	0

## Sheet: Glossary
ETHNICITY			SCHOOLING				SMOKING
CAUCASIAN	1		HIGHSCHOOL NOT FINISHED	1	1		NEVER	1	1
INDIAN	2		HIGHSCHOOL COMPLETE	2	1		STOP	2	2
AFRICAN	3		COLLEGE NOT FONISHED	3	1		YES	3	2
MIXED	4		COLLEGE COMPLETE	4	2
			POSTGRAD NOT FONISHED	5	2		ALCOHOL
PARTNER			POSTGRAD COMPLETE	6	3		NEVER	1	1
YES	1						STOP MORE THAN 1Y	2	1
NO	2		INCOME				LESS THAN ONCE A WEEK	3	2
NEVER	3		LESS THEN 2	1	1		1x a week	4	2
			2 TO 4	2	1		2x a week	5	3
			4 TO 10	3	2		3x a week	6	3
			10 TO 20	4	3		4x a week	7	3
			MORE THAN 20	5	3		5x a week	8	3
							6x a week	9	3
							7x a week	10	3
							PHISIC ACTIVITY A WEEK	0	1
								1	2
								2	2
								3	3
								4	3
								5	3
								6	3
								7	3

## Sheet: Full
DYSMENORRHEA PRE	DYSPAREUNIA PRE	MENSTRUAL DYSCHEZIA PRE	NONMENSTRUAL DYSCHEZIA PRE	MENSTRUAL STRANGURY PRE	NONMENSTRUAL STRANGURY PRE	NONMENSTRUAL PELVIC PAIN PRE	HOW LONG PELVIC PAIN	CYCLIC LEG PAIN PRE	LOMBAR CYCLIC PAIN PRE	HEMATURIA PRE	RENAL STONE IN THE PAST PRE	RECURRENT URINARY INFECTION PRE	URGENCY PRE	INTERMITENCY PRE	INCOMPLETE VOIDING PRE	STRENGTH TO VOID PRE	INTESTINALCYCLIC PRE	INTESTINALCYCLIC PRE	ORIFICE CONDITION PRE	INFLAMATORY BOWEL DISEASE PRE	CYCLICAL ABDOMINAL DISTENSION PRE	HEMATOQUEZIA PRE	USE OF LAXANT PRE	ESTIMATED PERIOD BETWEEN EVACUATION PRE (H)	TIME TO EVACUATE (MIN) PRE	INCOMPLETE EVACUATION SENOT APPLIEDTION PRE	WEIGHT PRE KG	HEIGHT M	BMI PRE	DATE CA125PRE	DATE6M	DYEMENORRHEA 6M	DYSPAREUNIA 6M	MENSTRUAL DYSCHEZIA 6M	NONMENSTRUAL DYSCHEZIA 6M	MENSTRUAL STRANGURY 6M	NONMENSTRUAL STRANGURY 6M	NONMENSTRUAL PELVIC PAIN 6M	CYCLIC LEG PAIN 6M	CYCLIC LOMBAR PAIN 6M	BACOK TO JOB (DAYS)	PERSONAL COMMENTS	PREGNANCY 6M	Urgency 6M	INTERMITENCY 6M	INCOMPLETE VOIDING 6M	STRENGTH TO VOID 6M	HEMATUR 6M	RENAL STONE 6M
6	0	3	5	0	0	5	12	1	1	0	1	0	0	0	0	0			1	0	1	0	1	96	10	1	57	1,58	22.83	confidential individual information	confidential individual information	NOT APPLIED	0	NOT APPLIED	0	NOT APPLIED	0	0	0	0	20	confidential individual information	Got pregnant naturally after surgery	Yes	Yes	Yes	No	No	No
0	0	0	0	0	0	0	0	0	0	0	0	0	0	0	0	0	0	0	0	0	0	0	0	24	3	0	61	1,68	21.61	confidential individual information	confidential individual information	NOT APPLIED	0	NOT APPLIED	0	NOT APPLIED	0	0	NOT APPLIED	NOT APPLIED	20	confidential individual information	Did not try to get pregnant after surgery	No	No	No	No	No	No
	0		0		0	3	12			0	1	0	0	0	0	0			0	0		0	0	96	5	1	57	1,62	21.72	confidential individual information	confidential individual information	NOT APPLIED	0	NOT APPLIED	8	NOT APPLIED	0	5	NOT APPLIED	NOT APPLIED	60	confidential individual information	Did not try to get pregnant after surgery	No	No	No	No	No	No
	10		7		8	10	60	1	1	0	0	0	1	1	1	0	CONSTIPATION TREND	1	1	0	1	0	1	48	3	1	51	1,67	18.29	confidential individual information	confidential individual information	NOT APPLIED	6	NOT APPLIED	0	NOT APPLIED	0	7	0	0	30	confidential individual information	Did not try to get pregnant after surgery	No	No	No	No	No	No
	6		6		0	3	17	0	0	0	0	0	1	0	1	1	CONSTIPATION TREND	1	0	0	1	0	0	48	5	1	63	1,66	22.86	confidential individual information	confidential individual information	3	0	0	0	0	0	0	0	1	15	confidential individual information	Got pregnant naturally after surgery	No	No	No	No	No	No
10	3	10	10	8	6	9	60	1	1	1	0	1	0	1	1	1	0	0	0	1	1	1	1	192	60	1	85	1,59	33.62	confidential individual information	confidential individual information	3	0	0	3	0	0	3	1	0	90	confidential individual information	Did not try to get pregnant after surgery	No	No	No	No	No	No
10	10	0	0	0	0	0	0	1	1	0	0	0	0	0	0	0	DIARRHEA TREND	2	0	0	0	0	0	72	5	0	85	1,68	30.12	confidential individual information	confidential individual information	NOT APPLIED	0	NOT APPLIED	4	NOT APPLIED	0	NOT APPLIED	NOT APPLIED	NOT APPLIED	60	confidential individual information	Got pregnant naturally after surgery	No	No	Yes	Yes	No	No
10	0	0	0	0	0	0	0	1	1	0	0	0	1	0	0	0	0	0	1	0	1	0	0	24	5	0	55	1,62	20.96	confidential individual information	confidential individual information	0	0	0	0	0	0	0	0	0	500	confidential individual information	Did not try to get pregnant after surgery	No	Yes	No	Yes	No	0
10	6	7	0	0	0	5	60	1	1	0	0	1	1	1	1	0	DIARRHEA TREND	2	1	0	0	0	0	12	2	1	92	1,60	35.94	confidential individual information	confidential individual information	0	0	0	0	0	0	0	0	0	124	confidential individual information	Did not try to get pregnant after surgery	No	Yes	Yes	Yes	No	No
10	5	10	9	0	0	4	42	1	1	0	0	0	0	0	0	0	DIARRHEA TREND	2	1	0	1	0	0	12	4	1	67	1,56	27.53	confidential individual information	confidential individual information	NOT APPLIED	0	NOT APPLIED	5	NOT APPLIED	0	0	0	0	45	confidential individual information	Did not try to get pregnant after surgery	No	No	No	No	No	No
7	0	9	0	0	0	8	20	1	1	0	0	0	0	1	1	1	DIARRHEA TREND	2	0	0	1	0	0	24	1	0	58	1,54	24.46	confidential individual information	confidential individual information	NOT APPLIED	8	NOT APPLIED	0	NOT APPLIED	0	0	0	0	45	confidential individual information	Did not try to get pregnant after surgery	Yes	Yes	Yes	Yes	No	No
8	0	2	0	0	0	6	24	1	1	0	0	0	0	0	0	0	DIARRHEA TREND	2	1	0	0	0	0	12	2	0	72	1,65	26.45	confidential individual information	confidential individual information	3	0	0	0	0	0	2	0	1	40	confidential individual information	Did not try to get pregnant after surgery	No	No	No	No	No	No
6	10	5	0	0	0	0	0	0	1	0	0	0	0	0	0	0	0	0	0	0	0	0	0	48	3	1	54	1,70	18.69	confidential individual information	confidential individual information	NOT APPLIED	0	NOT APPLIED	0	NOT APPLIED	0	1	NOT APPLIED	NOT APPLIED	20	confidential individual information	Did not try to get pregnant after surgery	No	No	No	No	No	No
2	0	0	0	0	0	2	6	1	1	0	0	0	0	1	1	1	DIARRHEA TREND	2	0	0	1	0	0	24	15	1	68	1,78	21.46	confidential individual information	confidential individual information	NOT APPLIED	0	NOT APPLIED	3	NOT APPLIED	0	0	0	0	60	confidential individual information	Did not try to get pregnant after surgery	No	Yes	No	Yes	No	No
9	5	0	0	0	0	5	3	1	1	0	0	0	0	0	1	0	CONSTIPATION TREND	1	0	0	1	0	0	192	15	1	58	1,62	22.1	confidential individual information	confidential individual information	NOT APPLIED	0	NOT APPLIED	0	0	0	0	0	0	45	confidential individual information	Did not try to get pregnant after surgery	No	No	No	No	No	No
8	4	7	5	7	0	5	3	0	0	0	0	0	0	1	0	0	DIARRHEA TREND	2	1	0	1	1	0	96	5	1	55	1,64	20.45	confidential individual information	confidential individual information	5	9	0	0	0	0	5	1	1	45	confidential individual information	FAILED to get pregnant after surgery	No	Yes	Yes	Yes	No	No
10	8	0	0	0	0	3	240	1	1	0	0	0	0	0	0	0	0	0	1	0	1	0	0	120	2	0	60	1,55	24.97	confidential individual information	confidential individual information	0	0	0	0	0	0	0	0	0	45	confidential individual information	Did not try to get pregnant after surgery	No	No	No	No	No	No
10	0	5	0	0	0	4	72	1	1	0	1	0	0	0	0	0	CONSTIPATION TREND	1	1	0	1	1	0	72	5	0	58	1,59	22.94	confidential individual information	confidential individual information	5	8	0	0	0	0	0	0	0	62	confidential individual information	FAILED to get pregnant after surgery	No	No	No	No	No	No
8	6	4	0	5	4	2	3	0	0	0	1	0	1	0	0	1	CONSTIPATION TREND	1	0	0	1	1	0	24	12	0	69	1,77	22.02	confidential individual information	confidential individual information	NOT APPLIED	0	NOT APPLIED	0	NOT APPLIED	0	0	0	0	30	confidential individual information	Did not try to get pregnant after surgery	No	Yes	Yes	Yes	No	No
10	5	7	0	5	0	4	24	0	1	0	0	0	0	0	0	0	DIARRHEA TREND	2	0	1	1	0	0	72	5	1	55	1,64	20.45	confidential individual information	confidential individual information	8	5	4	2	3	0	4	0	1	15	confidential individual information	FAILED to get pregnant after surgery	No	No	No	No	No	No
	4	0	0	0	0	0	0	0	0	1	0	1	1	0	1	1			0	0	1	1	0	48	20	0	53	1,61	20.45	confidential individual information	confidential individual information	NOT APPLIED	4	NOT APPLIED	0	NOT APPLIED	0	0	NOT APPLIED	NOT APPLIED	40	confidential individual information	Did not try to get pregnant after surgery	No	No	No	No	No	No
9	2	8	0	0	0	7	12	1	1	0	0	0	0	0	0	0	CONSTIPATION TREND	1	0	0	1	0	0	24	5	0	57	1,58	22.83	confidential individual information	confidential individual information	0	0	0	0	0	0	0	0	0	90	confidential individual information	FAILED to get pregnant after surgery	No	No	No	No	No	No
10	8	10	0	10	7	4	48	1	1	0	0	0	1	0	1	0	0	0	0	0	0	0	0	48	10	0	52	1,66	18.87	confidential individual information	confidential individual information	NOT APPLIED	0	NOT APPLIED	0	NOT APPLIED	0	0	NOT APPLIED	NOT APPLIED	30	confidential individual information	Did not try to get pregnant after surgery	Yes	No	Yes	No	No	No
10	3	10	0	0	0	4	0	0	1	0	0	0	0	0	1	0	DIARRHEA TREND	2	0	0	1	0	0	24	5	1	63	1,68	22.32	confidential individual information	confidential individual information	NOT APPLIED	0	NOT APPLIED	0	NOT APPLIED	0	NOT APPLIED	NOT APPLIED	0	30	confidential individual information	Got pregnant naturally after surgery	No	Yes	No	Yes	No	No
10	0	8	0	0	0	7	180	0	1	0	0	0	1	0	0	1	DIARRHEA TREND	2	0	0	0	1	0	12	5	1	90	1,65	33.06	confidential individual information	confidential individual information	4	0	0	0	0	0	4	0	1	15	confidential individual information	FAILED to get pregnant after surgery	No	No	No	No	No	No
9	0	8	0	0	0	6	24	1	1	0	0	0	1	1	1	1	0	0	0	0	1	0	0	24	2	0	47	1,55	19.56	confidential individual information	confidential individual information	NOT APPLIED	0	NOT APPLIED	0	NOT APPLIED	0	0	0	0	90	confidential individual information	Did not try to get pregnant after surgery	No	Yes	No	Yes	No	No
4	0	2	0	0	0	3	4	0	0	0	1	0	0	1	1	0	CONSTIPATION TREND	1	0	0	1	0	0	24	15	1	56	1,54	23.61	confidential individual information	confidential individual information	NOT APPLIED	0	0	0	0	0	0	0	0	90	confidential individual information	Did not try to get pregnant after surgery	No	No	Yes	Yes	No	No
6	0	0	0	0	0	0	0	1	1	0	0	0	1	0	1	0	0	0	0	0	0	0	0	24	5	0	68	1,58	27.24	confidential individual information	confidential individual information	0	0	0	0	0	0	0	0	0	45	confidential individual information	Did not try to get pregnant after surgery	No	No	No	No	No	No
9	6	0	0	0	0	5	6	1	1	0	0	0	1	0	0	0	CONSTIPATION TREND	1	1	0	1	0	0	72	5	1	53	1,53	22.64	confidential individual information	confidential individual information	NOT APPLIED	10	NOT APPLIED	5	NOT APPLIED	3	7	1	0	40	confidential individual information	Did not try to get pregnant after surgery	Yes	No	No	No	No	No
5	0	8	0	0	0	3	8	0	1	0	0	0	0	0	0	0	0	0	0	0	1	0	0	24	2	0	52	1,53	22.21	confidential individual information	confidential individual information	NOT APPLIED	0	NOT APPLIED	0	NOT APPLIED	0	0	NOT APPLIED	NOT APPLIED	40	confidential individual information	Did not try to get pregnant after surgery	No	No	No	No	No	No
0	0	9	0	0	0	0	0	1	0	0	1	0	0	0	0	0	CONSTIPATION TREND	1	0	0	0	1	1	72	2	0	66	1,67	23.67	confidential individual information	confidential individual information	0	0	0	2	0	0	0	0	0	60	confidential individual information	Did not try to get pregnant after surgery	No	Yes	Yes	Yes	No	No
8	0	6	0	0	0	7	24	1	1	0	0	0	0	0	0	0	0	0	0	0	1	0	0	24	10	0	55	1,55	22.89	confidential individual information	confidential individual information	NOT APPLIED	0	NOT APPLIED	0	NOT APPLIED	8	0	0	0	60	confidential individual information	Did not try to get pregnant after surgery	No	No	No	Yes	No	No
3	0	0	0	0	0	0	0	0	0	0	0	0	0	0	0	0	0	0	0	0	0	0	0	8	3	0	50	1,58	20.03	confidential individual information	confidential individual information	NOT APPLIED	0	NOT APPLIED	0	NOT APPLIED	0	0	0	0	15	confidential individual information	Did not try to get pregnant after surgery	No	No	No	No	No	No
9	5	6	4	4	2	7	4	1	1	0	0	0	0	0	0	0	CONSTIPATION TREND	1	1	0	1	1	0	24	2	0	60	1,69	21.01	confidential individual information	confidential individual information	1	0	2	0	0	0	0	0	0	37	confidential individual information	Did not try to get pregnant after surgery	No	No	Yes	No	No	No
10	0	10	2	3	0	2	9	1	1	0	0	0	1	0	0	0	DIARRHEA TREND	2	1	0	1	0	0	24	5	1	67	1,63	25.22	confidential individual information	confidential individual information	1	2	0	0	0	0	0	0	0	30	confidential individual information	FAILED to get pregnant after surgery	No	No	Yes	Yes	No	No
8	0	0	4	0	4	7	9	0	0	0	0	0	1	0	1	1	CONSTIPATION TREND	1	0	0	1	0	0	48	8	1	67	1,61	25.85	confidential individual information	confidential individual information	7	0	0	0	0	0	5	0	0	10	confidential individual information	FAILED to get pregnant after surgery	No	No	No	No	No	No
9	9	0	0	5	0	4	9	1	1	0	0	0	1	1	1	0	CONSTIPATION TREND	1	0	1	1	0	0	24	15	1	63	1,63	23.71	confidential individual information	confidential individual information	NOT APPLIED	0	NOT APPLIED	0	NOT APPLIED	0	0	1	0	500	confidential individual information	Did not try to get pregnant after surgery	Yes	Yes	Yes	Yes	No	No
8	6	3	0	0	0	8	6	1	1	0	1	0	1	0	0	0	DIARRHEA TREND	2	0	0	1	0	0	24	3	0	65	1,57	26.37	confidential individual information	confidential individual information	NOT APPLIED	0	NOT APPLIED	0	NOT APPLIED	0	0	0	0	500	confidential individual information	Did not try to get pregnant after surgery	No	No	No	No	No	No
9	7	8	0	0	0	5	4	1	1	0	0	0	0	0	1	1	0	0	0	0	0	0	0	12	2	1	66	1,53	28.19	confidential individual information	confidential individual information	NOT APPLIED	0	NOT APPLIED	7	NOT APPLIED	0	0	0	0	0	confidential individual information	Did not try to get pregnant after surgery	No	No	No	Yes	No	No
10	6	10	6	8	8	6	24	1	1	0	0	0	1	1	1	1	DIARRHEA TREND	2	1	0	0	1	1	192	5	1	64	1,68	22.68	confidential individual information	confidential individual information	0	0	0	0	0	0	0	0	0	30	confidential individual information	FAILED to get pregnant after surgery	Yes	No	Yes	No	No	No
8	5	0	0	0	0	5	10	1	1	0	0	0	0	0	0	0	0	0	0	0	0	0	0	24	2	0	50	1,55	20.81	confidential individual information	confidential individual information	0	0	0	0	0	0	0	0	0	15	confidential individual information	FAILED to get pregnant after surgery	No	No	No	No	No	No
8	7	8	0	0	0	0	0	0	0	0	0	0	0	0	0	0	0	0	0	0	1	0	0	48	5	0	74	1,60	28.91	confidential individual information	confidential individual information	0	0	0	0	0	0	0	0	0	45	confidential individual information	FAILED to get pregnant after surgery	No	No	No	No	No	No
8	10	7	0	0	0	9	24	0	1	0	0	1	0	0	0	0	CONSTIPATION TREND	1	0	0	1	0	0	48	3	1	63	1,50	28	confidential individual information	confidential individual information	NOT APPLIED	2	NOT APPLIED	0	NOT APPLIED	0	0	NOT APPLIED	NOT APPLIED	30	confidential individual information	Did not try to get pregnant after surgery	No	No	No	No	No	No
10	0	0	0	0	0	0	0	1	1	0	0	0	1	0	0	0	CONSTIPATION TREND	1	0	0	1	0	0	24	5	1	62	1,60	24.22	confidential individual information	confidential individual information	NOT APPLIED	0	NOT APPLIED	0	NOT APPLIED	0	0	0	0	10	confidential individual information	Did not try to get pregnant after surgery	No	No	No	No	No	No
7	3	4	5	0	0	5	4	1	1	0	0	0	0	0	1	0	DIARRHEA TREND	2	0	0	0	0	0	24	3	1	83	1,63	31.24	confidential individual information	confidential individual information	6	0	0	0	0	0	0	1	1	15	confidential individual information	FAILED to get pregnant after surgery	No	No	Yes	No	No	No
6	4	10	0	0	0	2	5	1	0	0	0	0	0	0	0	0	DIARRHEA TREND	2	0	0	1	0	0	24	15	0	103	1,71	35.22	confidential individual information	confidential individual information	NOT APPLIED	0	NOT APPLIED	0	NOT APPLIED	0	3	0	0	15	confidential individual information	Did not try to get pregnant after surgery	No	No	No	No	No	No
8	6	9	7	0	0	4	8	0	1	0	0	0	0	0	0	0	DIARRHEA TREND	2	0	0	1	1	0	48	1	1	59	1,65	21.67	confidential individual information	confidential individual information	4	0	0	0	0	0	0	0	1	30	confidential individual information	FAILED to get pregnant after surgery	No	No	No	No	No	No
0	0	5	5	0	0	7	4	0	0	0	0	0	1	0	0	0	0	0	0	0	1	0	0	24	2	0	78	1,64	29	confidential individual information	confidential individual information	NOT APPLIED	0	NOT APPLIED	0	NOT APPLIED	0	0	0	0	60	confidential individual information	Did not try to get pregnant after surgery	No	No	No	No	No	No
1	6	0	0	0	0	3	396	0	0	0	0	0	0	0	0	0	CONSTIPATION TREND	1	1	0	0	0	0	24	2	0	86	1,73	28.73	confidential individual information	confidential individual information	NOT APPLIED	0	NOT APPLIED	0	NOT APPLIED	0	5	0	0	40	confidential individual information	Did not try to get pregnant after surgery	No	No	No	No	No	No
10	8	10	10	0	0	0	0	0	1	0	0	0	0	0	0	0	DIARRHEA TREND	2	1	0	1	0	0	168	60	1	75	1,62	28.58	confidential individual information	confidential individual information	NOT APPLIED	0	NOT APPLIED	0	NOT APPLIED	0	8	NOT APPLIED	0	45	confidential individual information	Did not try to get pregnant after surgery	Yes	No	No	No	No	No
10	4	4	0	0	0	0	0	0	0	0	0	0	1	0	0	0	DIARRHEA TREND	2	0	0	0	0	0	24	2	0	55	1,67	19.72	confidential individual information	confidential individual information	NOT APPLIED	0	NOT APPLIED	0	NOT APPLIED	0	0	NOT APPLIED	NOT APPLIED	40	confidential individual information	FAILED to get pregnant after surgery	No	No	No	Yes	No	No
9	5	0	10	0	0	8	3	1	1	0	0	0	1	1	1	1	DIARRHEA TREND	2	0	0	0	0	1	72	60	1	91	1,67	32.63	confidential individual information	confidential individual information	NOT APPLIED	8	NOT APPLIED	7	NOT APPLIED	0	0	NOT APPLIED	NOT APPLIED	25	confidential individual information	Did not try to get pregnant after surgery	No	No	No	No	No	No
8	8	9	6	5	0	8	72	1	1	0	0	0	0	0	1	1	DIARRHEA TREND	2	0	0	1	1	0	24	5	0	59	1,62	22.48	confidential individual information	confidential individual information	NOT APPLIED	7	NOT APPLIED	0	NOT APPLIED	0	4	NOT APPLIED	NOT APPLIED	30	confidential individual information	Did not try to get pregnant after surgery	No	No	No	No	No	No
9	6	8	0	0	0	0	0	0	1	0	0	0	1	0	0	0	DIARRHEA TREND	2	0	0	1	0	0	48	10	1	55	1,63	20.7	confidential individual information	confidential individual information	2	2	0	0	6	0	0	0	0	20	confidential individual information	Did not try to get pregnant after surgery	Yes	No	No	No	No	No
7	7	8	0	0	0	5	24	0	0	0	0	0	1	0	0	0	DIARRHEA TREND	2	0	0	1	0	0	24	2	0	57	1,65	20.94	confidential individual information	confidential individual information	0	5	0	0	0	0	2	0	0	45	confidential individual information	FAILED to get pregnant after surgery	Yes	No	No	No	No	No
	3		0		0	0	0	0	0	0	0	0	1	0	0	0	0	0	0	0	0	0	0	24	5	0	76	1,70	26.3	confidential individual information	confidential individual information	NOT APPLIED	3	NOT APPLIED	0	NOT APPLIED	0	0	NOT APPLIED	NOT APPLIED	30	confidential individual information	Did not try to get pregnant after surgery	Yes	No	No	No	No	No
	0		0		0	5	84	1	1	0	1	0	0	0	0	0	0	0	0	0	1	0	0	12	5	0	54	1,58	21.63	confidential individual information	confidential individual information	NOT APPLIED	0	NOT APPLIED	0	NOT APPLIED	0	0	NOT APPLIED	NOT APPLIED	30	confidential individual information	Got pregnant naturally after surgery	No	No	No	No	No	No
10	7	10	4	0	0	6	7	0	1	0	0	0	1	1	0	1	DIARRHEA TREND	2	0	1	1	0	0	12	10	0	90	1,53	38.45	confidential individual information	confidential individual information	0	0	0	0	0	0	0	0	0	20	confidential individual information	Did not try to get pregnant after surgery	No	No	No	No	No	No
10	6	7	6	7	5	7	60	1	1	1	0	0	0	0	0	0	CONSTIPATION TREND	1	1	0	1	0	0	24	1	0	57	1,65	20.94	confidential individual information	confidential individual information	4	0	0	0	0	0	0	0	0	45	confidential individual information	Did not try to get pregnant after surgery	No	No	No	No	No	No
6	5	3	3	0	4	6	12	1	1	0	0	0	0	0	0	0	0	0	0	0	0	0	0	24	5	1	65	1,54	27.41	confidential individual information	confidential individual information	NOT APPLIED	0	NOT APPLIED	3	NOT APPLIED	2	3	NOT APPLIED	NOT APPLIED	30	confidential individual information	Got pregnant naturally after surgery	No	No	No	No	No	No
9	6	0	0	4	0	4	5	1	0	0	0	0	0	0	0	0	CONSTIPATION TREND	1	0	0	1	0	1	48	2	0	70	1,61	27.01	confidential individual information	confidential individual information	3	0	0	0	0	0	0	0	0	30	confidential individual information	Got pregnant naturally after surgery	No	No	No	No	No	No
	9		0		0	10	60	1	1	0	0	0	0	0	0	0	DIARRHEA TREND	2	0	0	1	0	0	72	20	1	63	1,55	26.22	confidential individual information	confidential individual information	NOT APPLIED	3	NOT APPLIED	0	NOT APPLIED	0	4	NOT APPLIED	NOT APPLIED	45	confidential individual information	Did not try to get pregnant after surgery	No	No	Yes	Yes	No	No
10	3	0	0	0	0	10	6	0	1	0	0	0	0	0	0	0	0	0	0	0	1	0	0	24	2	0	58	1,57	23.53	confidential individual information	confidential individual information	NOT APPLIED	0	NOT APPLIED	0	NOT APPLIED	3	9	0	0	25	confidential individual information	Did not try to get pregnant after surgery	No	No	Yes	No	No	No
0	0	0	0	0	0	0	0	1	1	0	0	0	0	1	1	0	CONSTIPATION TREND	1	0	0	1	0	0	24	2	0	62	1,69	21.71	confidential individual information	confidential individual information	NOT APPLIED	0	NOT APPLIED	0	NOT APPLIED	0	0	NOT APPLIED	NOT APPLIED	60	confidential individual information	Did not try to get pregnant after surgery	No	No	No	Yes	No	No
	6		5		0	6	24	1	1	0	1	0	0	0	1	0	CONSTIPATION TREND	1	0	0		0	0	48	6	1	58	1,58	23.23	confidential individual information	confidential individual information	NOT APPLIED	3	NOT APPLIED	2	NOT APPLIED	0	2	NOT APPLIED	NOT APPLIED	30	confidential individual information	Did not try to get pregnant after surgery	No	Yes	Yes	No	No	No
	0		0		0	8	34	1	1	0	0	0	0	0	0	0	DIARRHEA TREND	2	1	0	1	0	0	48	5	0	69	1,64	25.65	confidential individual information	confidential individual information	NOT APPLIED	0	NOT APPLIED	0	NOT APPLIED	0	0	NOT APPLIED	NOT APPLIED	40	confidential individual information	FAILED to get pregnant after surgery	Yes	No	No	Yes	No	No
10	6	0	0	0	0	4	6	0	1	0	0	0	0	0	0	0	DIARRHEA TREND	2	0	1	1	0	0	24	3	0	62	1,59	24.52	confidential individual information	confidential individual information	3	4	0	5	0	0	4	0	0	45	confidential individual information	Did not try to get pregnant after surgery	No	No	No	No	No	No
4	0	6	0	0	0	0	0	0	0	0	0	0	0	0	1	0	DIARRHEA TREND	2	0	0	1	0	0	96	20	1	89	1,63	33.5	confidential individual information	confidential individual information	0	0	0	0	0	0	0	0	0	40	confidential individual information	FAILED to get pregnant after surgery	No	No	No	No	No	No
10	10	2	0	0	0	3	180	1	1	0	1	0	0	0	0	0	0	0	0	1	1	0	0	12	2	0	52	1,54	21.93	confidential individual information	confidential individual information	NOT APPLIED	0	NOT APPLIED	0	NOT APPLIED	0	0	NOT APPLIED	NOT APPLIED	15	confidential individual information	Did not try to get pregnant after surgery	No	No	No	No	No	No
0	0	0	0	0	0	0	0	0	0	0	0	0	0	0 Informado	0	0	0	0	0	0	0	0	0	12	5	1	98	1,67	35.14	confidential individual information	confidential individual information	0	0	0	0	0	0	0	0	0	15	confidential individual information	FAILED to get pregnant after surgery	No	No	No	No	No	No
8	0	0	0	0	0	0	0	0	1	0	0	0	0	0	0	0	DIARRHEA TREND	2	0	0	0	0	0	24	3	0	57	1,59	22.55	confidential individual information	confidential individual information	NOT APPLIED	0	NOT APPLIED	0	NOT APPLIED	0	0	NOT APPLIED	NOT APPLIED	15	confidential individual information	Did not try to get pregnant after surgery	No	No	No	No	No	No
7	6	5	4	0	0	4	36	1	1	0	0	0	0	0	0	0	DIARRHEA TREND	2	0	0	1	0	0	24	33	1	77	1,66	27.94	confidential individual information	confidential individual information	NOT APPLIED	0	NOT APPLIED	0	NOT APPLIED	0	0	NOT APPLIED	NOT APPLIED	15	confidential individual information	Did not try to get pregnant after surgery	No	No	Yes	No	No	No
	0		0		0	10	3	1	1	1	0	0	1	1	1	1	CONSTIPATION TREND	1	0	0	1	0	0	24	10	1	70	1,70	24.22	confidential individual information	confidential individual information	NOT APPLIED	6	NOT APPLIED	4	NOT APPLIED	0	3	NOT APPLIED	NOT APPLIED	30	confidential individual information	Did not try to get pregnant after surgery	No	No	No	No	No	No
	9		8		0	9	36	1	1	0	1	0	1	1	1	1	0	0	0	0	1	0	0	120	3	1	69	1,61	26.62	confidential individual information	confidential individual information	NOT APPLIED	9	NOT APPLIED	8	NOT APPLIED	2	2	NOT APPLIED	NOT APPLIED	30	confidential individual information	Did not try to get pregnant after surgery	No	No	Yes	Yes	No	No
10	8	10	4	6	0	5	2	1	1	0	0	0	0	1	1	1	DIARRHEA TREND	2	0	0	1	0	0	72	5	1	50	1,57	20.28	confidential individual information	confidential individual information	NOT APPLIED	0	NOT APPLIED	0	NOT APPLIED	0	0	NOT APPLIED	NOT APPLIED	60	confidential individual information	Did not try to get pregnant after surgery	No	No	No	No	No	No
2	0	0	0	0	0	0	0	0	0	0	0	0	1	0	0	0	0	0	0	0	1	0	0	12	2	0	60	1,65	22.04	confidential individual information	confidential individual information	NOT APPLIED	0	NOT APPLIED	0	NOT APPLIED	0	0	NOT APPLIED	NOT APPLIED	20	confidential individual information	Did not try to get pregnant after surgery	Yes	No	No	No	No	No
8	0	8	0	5	0	0	0	0	1	0	0	0	1	0	1	1	DIARRHEA TREND	2	0	0	1	1	0	48	2	0	75	1,76	24.21	confidential individual information	confidential individual information	NOT APPLIED	0	NOT APPLIED	0	NOT APPLIED	0	0	NOT APPLIED	NOT APPLIED	40	confidential individual information	Did not try to get pregnant after surgery	No	No	No	No	No	No
5	0	0	0	0	0	5	2	0	0	0	0	0	0	0	0	0	0	0	0	0	0	0	0	24	5	1	70	1,65	25.71	confidential individual information	confidential individual information	NOT APPLIED	0	NOT APPLIED	0	NOT APPLIED	0	0	NOT APPLIED	NOT APPLIED	30	confidential individual information	Did not try to get pregnant after surgery	No	No	No	No	No	No
9	10	8	0	0	0	6	18	1	1	0	0	0	1	1	1	1	DIARRHEA TREND	2	0	0	1	0	0	8	3	1	72	1,62	27.43	confidential individual information	confidential individual information	0	0	0	0	0	0	9	0	0	120	confidential individual information	Did not try to get pregnant after surgery	Yes	No	Yes	Yes	No	No
8	0	10	0	0	0	0	0	0	0	0	0	0	0	1	1	0	DIARRHEA TREND	2	1	0	0	0	0	48	5	0	65	1,65	23.88	confidential individual information	confidential individual information	0	0	0	0	0	0	0	0	0	15	confidential individual information	NOT INFORMED	Yes	No	No	No	No	No
9	7	8	5	0	0	7	72	1	1	0	0	0	0	0	0	0	0	0	0	0	1	0	0	168	15	1	68	1,59	26.9	confidential individual information	confidential individual information	0	0	0	0	0	0	0	0	0	60	confidential individual information	FAILED to get pregnant after surgery	No	No	No	No	No	No
8	0	4	0	0	0	0	0	1	1	1	0	0	0	0	0	0	CONSTIPATION TREND	1	1	0	1	1	0	72	5	0	63	1,60	24.61	confidential individual information	confidential individual information	NOT APPLIED	5	NOT APPLIED	0	NOT APPLIED	0	5	NOT APPLIED	NOT APPLIED	90	confidential individual information	Did not try to get pregnant after surgery	No	Yes	Yes	No	Yes	No
6	7	0	0	0	0	4	0	1	1	0	0	1	1	1	1	1	0	0	0	0	1	0	0	24	5	1	77	1,70	26.64	confidential individual information	confidential individual information	NOT APPLIED	200	NOT APPLIED	3	NOT APPLIED	0	5	NOT APPLIED	NOT APPLIED	60	confidential individual information	Did not try to get pregnant after surgery	No	No	No	No	No	No
5	8	10	0	0	0	2	10	0	1	0	0	1	0	0	1	1	CONSTIPATION TREND	1	1	0	1	0	0	72	10	1	47	1,55	19.56	confidential individual information	confidential individual information	5	0	0	0	0	0	0	0	0	60	confidential individual information	Did not try to get pregnant after surgery	No	No	No	No	No	No
8	0	0	0	0	0	8	1	0	1	0	0	0	0	0	1	1	DIARRHEA TREND	2	0	0	1	0	0	24	10	0	90	1,70	31.14	confidential individual information	confidential individual information	NOT APPLIED	0	NOT APPLIED	0	NOT APPLIED	0	0	NOT APPLIED	NOT APPLIED	15	confidential individual information	Did not try to get pregnant after surgery	No	No	No	No	No	No
0	8	0	0	0	0	10	3	0	1	0	0	0	0	0	0	0	CONSTIPATION TREND	1	1	0	1	0	1	72	10	1	75	1,72	25.35	confidential individual information	confidential individual information	NOT APPLIED	9	NOT APPLIED	9	NOT APPLIED	0	8	NOT APPLIED	NOT APPLIED	60	confidential individual information	Did not try to get pregnant after surgery	No	No	No	No	No	No
8	0	0	0	0	0	0	0	0	0	0	1	0	0	0	0	0	DIARRHEA TREND	2	1	1	1	0	0	24	5	0	66	1,68	23.38	confidential individual information	confidential individual information	NOT APPLIED	0	NOT APPLIED	0	NOT APPLIED	0	0	NOT APPLIED	NOT APPLIED	30	confidential individual information	Did not try to get pregnant after surgery	No	No	No	No	No	No
10		0	0	0	0	0	0	0	1	0	0	0	0	0	0	0	DIARRHEA TREND	2	1	0	0	0	0	48	5	0	58	1,62	22.1	confidential individual information	confidential individual information	NOT APPLIED	200	NOT APPLIED	0	NOT APPLIED	0	0	NOT APPLIED	NOT APPLIED	45	confidential individual information	Did not try to get pregnant after surgery	No	No	No	No	No	No
0	10	0	0	0	0	8	1	0	0	0	0	0	1	0	0	0	0	0	0	0	0	1	1	192	10	1	58	1,55	24.14	confidential individual information	confidential individual information	NOT APPLIED	0	NOT APPLIED	0	NOT APPLIED	0	0	NOT APPLIED	NOT APPLIED	30	confidential individual information	Did not try to get pregnant after surgery	No	No	No	Yes	No	No
9	0	0	0	5	0	0	0	0	1	0	0	0	0	0	0	0	0	0	0	0	0	0	0	48	5	1	58	1,55	24.14	confidential individual information	confidential individual information	0	0	0	0	0	0	0	0	0	30	confidential individual information	FAILED to get pregnant after surgery	No	No	No	No	No	No
8	0	7	6	0	0	8	3	1	0	0	0	0	1	0	1	1	0	0	0	0	1	0	0	12	5	0	52	1,65	19.1	confidential individual information	confidential individual information	NOT APPLIED	0	NOT APPLIED	0	NOT APPLIED	0	0	NOT APPLIED	NOT APPLIED	45	confidential individual information	Did not try to get pregnant after surgery	Yes	No	No	No	No	No
9	9	9	4	0	0	8	12	1	1	0	0	0	1	0	1	0	DIARRHEA TREND	2	0	0	1	0	0	48	20	0	76	1,59	30.06	confidential individual information	confidential individual information	NOT APPLIED	7	NOT APPLIED	0	NOT APPLIED	0	5	NOT APPLIED	NOT APPLIED	90	confidential individual information	Did not try to get pregnant after surgery	No	No	Yes	No	Yes	No
5	0	8	0	0	0	0	0	0	1	0	0	0	1	0	1	0	DIARRHEA TREND	2	0	0	1	0	0	24	3	0	46	1,56	18.9	confidential individual information	confidential individual information	NOT APPLIED	0	NOT APPLIED	2	NOT APPLIED	0	0	NOT APPLIED	NOT APPLIED	60	confidential individual information	ABORTION	No	No	No	No	No	No
8	8	10	0	0	0	0	0	0	1	0	0	0	0	0	0	0	CONSTIPATION TREND	1	1	0	1	0	1	48	5	0	56	1,66	20.32	confidential individual information	confidential individual information	4	0	3	1	0	0	0	0	1	15	confidential individual information	ABORTION	Yes	No	No	No	No	No
	0		0		0	0	0	0	0	0	0	0	0	0	0	0	CONSTIPATION TREND	1	0	0	0	0	0	24	3	1	75	1,64	27.89	confidential individual information	confidential individual information	NOT APPLIED	0	NOT APPLIED	0	NOT APPLIED	0	0	NOT APPLIED	NOT APPLIED	34	confidential individual information	Did not try to get pregnant after surgery	No	No	No	No	No	No
	0		0		0	0	0	0	0	0	0	0	0	1	1	0			0	0	0	0	0	48	10	1	82	1,56	33.69	confidential individual information	confidential individual information	NOT APPLIED	0	NOT APPLIED	0	NOT APPLIED	0	0	NOT APPLIED	NOT APPLIED	15	confidential individual information	Did not try to get pregnant after surgery	No	No	No	No	No	No
	0		0		4	8	18		0	0	0	0	0	0	0	0	0	0	0	0	0	0	0	12	10	0	56	1,62	21.34	confidential individual information	confidential individual information	NOT APPLIED	0	NOT APPLIED	0	NOT APPLIED	0	0	NOT APPLIED	NOT APPLIED	30	confidential individual information	FAILED to get pregnant after surgery	No	No	No	No	No	No
3	0	0	0	0	0	9	144	1	1	0	0	0	0	0	0	0	0	0	0	1	0	0	0	24	2	0	58	1,67	20.8	confidential individual information	confidential individual information	NOT APPLIED	4	NOT APPLIED	0	NOT APPLIED	0	0	NOT APPLIED	NOT APPLIED	40	confidential individual information	Did not try to get pregnant after surgery	No	No	No	No	No	No
0	0	0	0	0	0	0	0	0	0	0	0	0	0	0	0	0	0	0	0	0	0	0	0	24	5	0	64	1,56	26.3	confidential individual information	confidential individual information	NOT APPLIED	0	NOT APPLIED	0	NOT APPLIED	0	5	NOT APPLIED	NOT APPLIED	15	confidential individual information	Did not try to get pregnant after surgery	No	No	No	No	No	No
10	8	10	8	6	0	8	1	1	0	0	1	0	0	0	0	0	DIARRHEA TREND	2	0	0	0	1	0	24	5	1	53	1,65	19.47	confidential individual information	confidential individual information	NOT APPLIED	3	NOT APPLIED	0	NOT APPLIED	0	3	NOT APPLIED	NOT APPLIED	30	confidential individual information	Did not try to get pregnant after surgery	No	No	Yes	Yes	No	No
10	0	10	0	0	0	9	60	1	1	0	0	0	0	0	1	1	CONSTIPATION TREND	1	0	0	1	0	0	12	15	1	72	1,62	27.43	confidential individual information	confidential individual information	NOT APPLIED	0	NOT APPLIED	0	NOT APPLIED	0	0	NOT APPLIED	NOT APPLIED	40	confidential individual information	Did not try to get pregnant after surgery	No	No	No	No	No	No
7	9	0	0	0	0	5	24	1	1	0	0	0	0	0	0	0	DIARRHEA TREND	2	0	0	1	0	0	24	5	0	57	1,70	19.72	confidential individual information	confidential individual information	7	7	0	0	0	0	6	1	1	15	confidential individual information	Did not try to get pregnant after surgery	No	No	No	No	No	No
8	8	0	0	8	0	0	0	1	0	0	0	0	0	0	0	0	DIARRHEA TREND	2	0	0	1	0	0	12	3	0	52	1,55	21.64	confidential individual information	confidential individual information	5	0	0	0	0	0	0	0	0	40	confidential individual information	FAILED to get pregnant after surgery	No	Yes	Yes	No	No	No
8	6	8	0	0	0	0	0	1	1	0	1	0	0	0	0	0	DIARRHEA TREND	2	0	0	1	0	0	48	10	1	53	1,65	19.47	confidential individual information	confidential individual information	NOT APPLIED	3	NOT APPLIED	0	NOT APPLIED	0	0	NOT APPLIED	NOT APPLIED	20	confidential individual information	Did not try to get pregnant after surgery	No	No	No	No	No	No
7	10	0	0	0	0	5	5	1	1	0	0	0	0	1	1	1	DIARRHEA TREND	2	0	1	1	0	0	12	15	1	48	1,60	18.75	confidential individual information	confidential individual information	NOT APPLIED	2	NOT APPLIED	0	NOT APPLIED	0	0	NOT APPLIED	NOT APPLIED	40	confidential individual information	Got pregnant naturally after surgery	No	No	No	No	No	No
10	0	3	0	3	0	5	5	1	1	0	0	0	1	1	1	1	DIARRHEA TREND	2	0	0	1	0	0	12	20	1	67	1,62	25.53	confidential individual information	confidential individual information	NOT APPLIED	0	NOT APPLIED	0	NOT APPLIED	0	0	NOT APPLIED	NOT APPLIED	45	confidential individual information	Did not try to get pregnant after surgery	No	No	No	No	No	No
8	0	0	0	0	0	0	0	1	1	0	1	0	0	0	0	0	CONSTIPATION TREND	1	0	0	1	0	0	24	20	1	55	1,59	21.76	confidential individual information	confidential individual information	0	0	0	0	0	0	0	0	0	30	confidential individual information	FAILED to get pregnant after surgery	No	No	No	No	No	No
10	0	0	0	0	0	5	10	1	1	1	0	0	1	1	1	1	DIARRHEA TREND	2	0	0	1	1	0	24	5	1	82	1,57	33.27	confidential individual information	confidential individual information	NOT APPLIED	0	NOT APPLIED	0	NOT APPLIED	0	NOT APPLIED	NOT APPLIED	NOT APPLIED	30	confidential individual information	Did not try to get pregnant after surgery	No	Yes	Yes	No	No	No
9	9	0	0	0	0	8	12	1	1	0	0	0	0	0	1	0	0	0	0	0	1	0	0	24	10	1	74	1,70	25.61	confidential individual information	confidential individual information	7	3	0	0	0	0	7	0	1	15	confidential individual information	FAILED to get pregnant after surgery	No	No	No	No	No	No
	7		0		0	9	24			0	0	0	0	0	1	1			0	0		0	1	48	5	1	60	1,60	23.44	confidential individual information	confidential individual information	NOT APPLIED	0	NOT APPLIED	0	NOT APPLIED	0	1	NOT APPLIED	NOT APPLIED	7	confidential individual information	Did not try to get pregnant after surgery	Yes	Yes	Yes	Yes	No	No
	0		0		0	4	24			0	0	0	1	1	1	1			1	0			0	24	3	1	72	1,65	26.45	confidential individual information	confidential individual information	NOT APPLIED	2	NOT APPLIED	0	NOT APPLIED	5	0	NOT APPLIED	NOT APPLIED	7	confidential individual information	Did not try to get pregnant after surgery	Yes	Yes	Yes	Yes	No	No
0	8	0	0	0	0	0	0	0	1	0	0	0	0	0	0	0	DIARRHEA TREND	2	1	0	1	1	0	24	3	0	93	1,74	30.72	confidential individual information	confidential individual information	NOT APPLIED	4	NOT APPLIED	2	NOT APPLIED	0	0	NOT APPLIED	NOT APPLIED	20	confidential individual information	Did not try to get pregnant after surgery	No	No	No	No	No	No
10	5	0	0	0	0	5	36	1	1	0	1	0	0	0	0	0	DIARRHEA TREND	2	1	0	1	0	0	24	5	0	67	1,68	23.74	confidential individual information	confidential individual information	1	200	0	0	0	0	1	1	0	16	confidential individual information	ABORTION	Yes	Yes	Yes	No	No	No
7	5	0	0	0	0	8	24	1	1	0	0	0	1	0	0	0	DIARRHEA TREND	2	1	0	1	0	0	12	2	0	86	1,67	30.84	confidential individual information	confidential individual information	5	7	0	0	0	0	0	0	1	20	confidential individual information	FAILED to get pregnant after surgery	No	Yes	No	Yes	No	No
10	8	9	0	8	0	5	30	0	0	0	1	0	0	0	0	0	DIARRHEA TREND	2	1	0	1	1	0	24	25	1	74	1,65	27.18	confidential individual information	confidential individual information	NOT APPLIED	7	NOT APPLIED	7	NOT APPLIED	7	2	NOT APPLIED	NOT APPLIED	60	confidential individual information	Did not try to get pregnant after surgery	Yes	Yes	No	Yes	No	Yes
8	0	0	0	0	0	6	2	1	0	0	0	0	0	0	0	0	DIARRHEA TREND	2	0	0	1	1	0	24	5	0	88	1,72	29.75	confidential individual information	confidential individual information	2	4	0	0	0	0	6	1	1	14	confidential individual information	FAILED to get pregnant after surgery	No	No	No	No	No	No
	4		0		0	6	36		0	1	1	0	1	0	1	1	DIARRHEA TREND	2	0	0	1	0	0	24	5	0	65	1,54	27.41	confidential individual information	confidential individual information	NOT APPLIED	0	NOT APPLIED	0	NOT APPLIED	0	3	NOT APPLIED	NOT APPLIED	40	confidential individual information	Did not try to get pregnant after surgery	Yes	Yes	No	Yes	No	No
1	4	4	0	0	0	0	0	1	1	0	0	0	0	0	0	0	0	0	1	0	1	0	0	24	4	0	57	1,58	22.83	confidential individual information	confidential individual information	3	4	9	9	1	1	0	0	0	30	confidential individual information	FAILED to get pregnant after surgery	No	No	No	No	No	No
9	8	9	0	0	0	9	24	1	1	0	0	0	0	0	1	0	DIARRHEA TREND	2	1	0	1	1	0	12	3	0	90	1,68	31.89	confidential individual information	confidential individual information	2	0	0	0	5	3	2	1	1	20	confidential individual information	FAILED to get pregnant after surgery	Yes	Yes	No	Yes	No	No
5	4	0	0	0	0	0	0	0	0	0	1	0	0	1	0	0	0	0	0	0	1	0	0	24	3	0	78	1,55	32.47	confidential individual information	confidential individual information	NOT APPLIED	200	NOT APPLIED	NOT APPLIED	NOT APPLIED	2	3	NOT APPLIED	NOT APPLIED	500	confidential individual information	Did not try to get pregnant after surgery	Yes	Yes	Yes	Yes	No	No
8	0	8	0	0	0	0	0	0	0	0	0	0	0	0	0	0	DIARRHEA TREND	2	0	0	1	0	0	12	8	0	75	1,69	26.26	confidential individual information	confidential individual information	NOT APPLIED	0	NOT APPLIED	0	NOT APPLIED	0	0	NOT APPLIED	NOT APPLIED	30	confidential individual information	Did not try to get pregnant after surgery	No	No	No	No	No	No
	0		0		8	0	0			0	0	0	0	0	0	0			0	0		0	0	24	10	0	68	1,69	23.81	confidential individual information	confidential individual information	1	1	6	4	0	0	0	0	0	21	confidential individual information	FAILED to get pregnant after surgery	No	No	No	No	No	No
9	3	7	0	0	0	6	36	1	1	0	0	0	0	0	0	0	DIARRHEA TREND	2	1	1	1	0	0	24	15	1	73	1,77	23.3	confidential individual information	confidential individual information	NOT APPLIED	200	NOT APPLIED	0	NOT APPLIED	0	0	NOT APPLIED	NOT APPLIED	15	confidential individual information	Did not try to get pregnant after surgery	No	Yes	Yes	Yes	No	No
5	0	7	0	0	0	0	0	0	1	0	0	0	0	0	0	0	0	0	0	0	1	0	0	24	5	0	80	1,59	31.64	confidential individual information	confidential individual information	2	0	0	0	0	0	2	1	0	20	confidential individual information	FAILED to get pregnant after surgery	No	No	No	No	No	No
8	0	0	0	0	0	0	0	1	0	0	0	0	0	0	0	0	DIARRHEA TREND	2	0	0	1	0	0	12	5	0	68	1,70	23.53	confidential individual information	confidential individual information	NOT APPLIED	7	NOT APPLIED	0	NOT APPLIED	0	0	NOT APPLIED	NOT APPLIED	20	confidential individual information	Did not try to get pregnant after surgery	No	No	Yes	No	No	No
4	2	0	0	0	0	2	1	0	0	0	0	0	0	0	0	0	CONSTIPATION TREND	1	0	0	1	0	0	24	3	0	75	1,68	26.57	confidential individual information	confidential individual information	NOT APPLIED	3	NOT APPLIED	1	NOT APPLIED	0	0	NOT APPLIED	NOT APPLIED	21	confidential individual information	Did not try to get pregnant after surgery	Yes	No	Yes	No	No	No
[truncated: 14 more columns]
